# Supplementary material
Source: publisher figshare collection journal article supplement (https://gsajournals.figshare.com/ndownloader/files/15684872)
Supplement: Supplementary file 1 [file 15684872]

## Sheet: Linkage groups
MapDisto graphical genetic map - 5/16/2018, 3:09:46 PM
																													10
																		Figure S2. genetic map of Rusty x PI 192051-1
